# Supplementary material for: Risk Predictive Model Based on Three DDR-Related Genes for Predicting Prognosis, Therapeutic Sensitivity, and Tumor Microenvironment in Hepatocellular Carcinoma
Source: Hindawi journal article supplement (doi:10.1155/2022/4869732), 2022-09-30

A

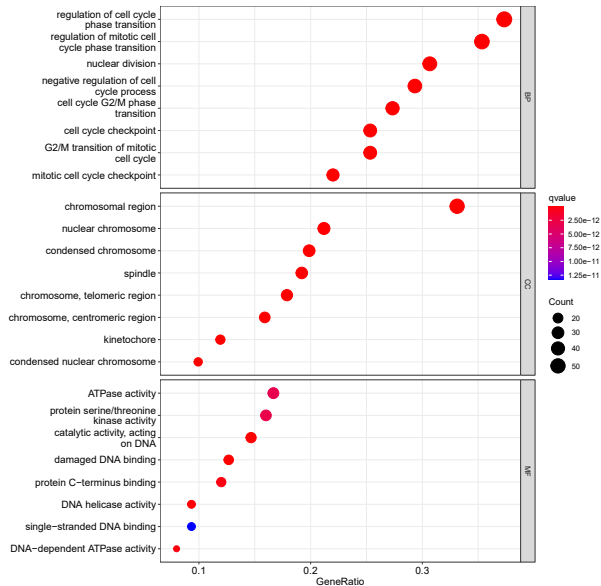

B

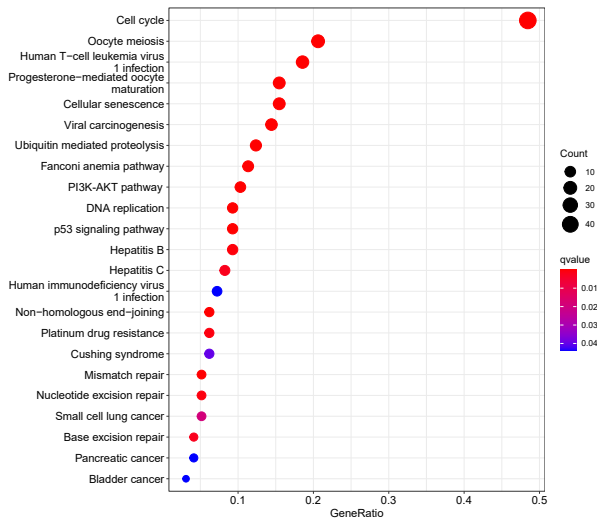

Supplement: f1 [file 4869732.f1.pdf]
